# Supplementary material for: Adiós a los tendidos peligrodod para las aves: cómo, cuándo y dónde
Source: Royal Society of Chemistry journal article supplement (doi:10.1039/d0cp03887c), 2009-01-01
Supplement: d0cp03887c3.pdf [file d0cp03887c3.pdf]

Electronic Supplementary Information (ESI)

**Pulsed neutron imaging for differentiation of ice and liquid water towards  
fuel cell vehicle applications**

Yuki Higuchi,<sup>\*a</sup> Daigo Setoyama,<sup>a</sup> Kazuhisa Isegawa,<sup>b</sup> Yusuke Tsuchikawa,<sup>b</sup> Yoshihiro Matsumoto,<sup>c</sup>  
Joseph Don Parker,<sup>c</sup> Takenao Shinohara<sup>b</sup> and Yasutaka Nagai<sup>a</sup>

<sup>a</sup> *Toyota Central R&D Labs., Inc., Nagakute, Aichi 480-1192, Japan. E-mail: e1571@mosk.tytlabs.co.jp*

<sup>b</sup> *Japan Atomic Energy Agency, Tokai 319-1195, Japan*

<sup>c</sup> *Comprehensive Research Organization for Science and Society, Tokai 319-1106, Japan*

## Table of Contents

**Figure S1:** Schematic illustration of PEFCs.

**Figure S2:** Schematic top view of full scale experiment.

**Figure S3:** Thawing process of ice in the capillary observed by visible light.

**Movie S1:** Identification images of ice and liquid water in capillary tubes under thawing process.

**Movie S2:** Ice and liquid water distribution in a full scale field of view under thawing process.

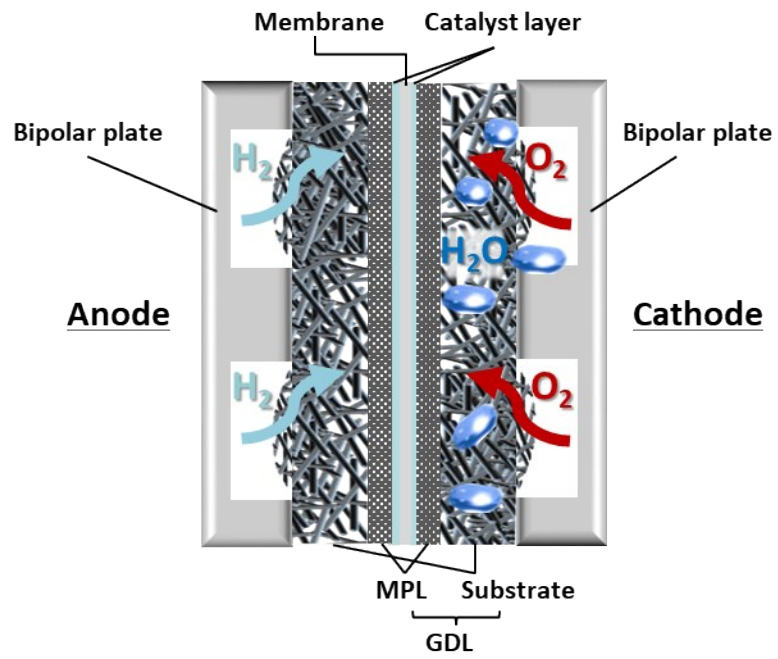

**Figure S1:** Schematic illustration of PEFCs.

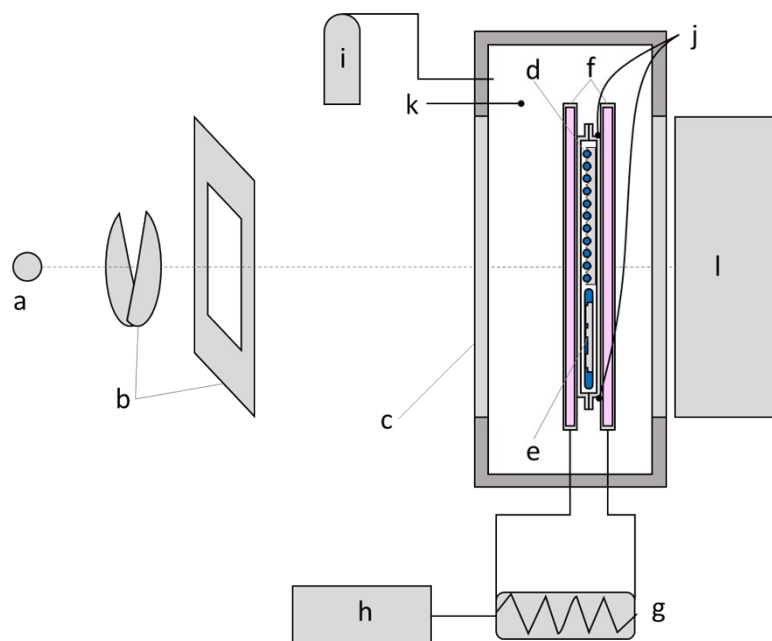

- a. Pulsed neutron source,
- b. Beam choppers and collimator,
- c. Thermal insulation chamber with Al alloy windows,
- d. Capillaries on a corrugated Al alloy plate,
- e. Additively manufactured Ti plate sealed in an Al foil bag,
- f. Cooling pads,
- g. Heat exchanger,
- h. Chiller,
- i. Dry gas supplier,
- j. Thermocouples,
- k. Dew point meter,
- l. Area detector.

**Figure S2:** Schematic top view of full scale experiment.

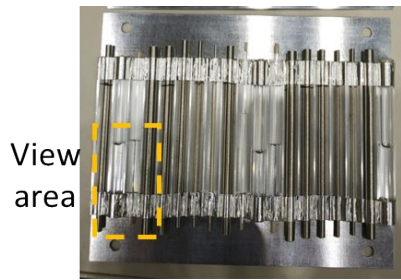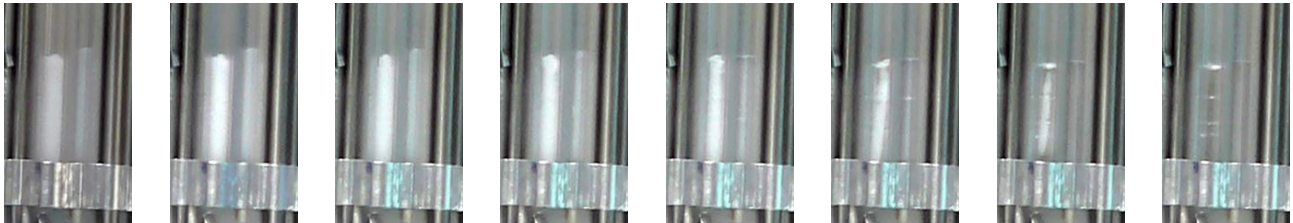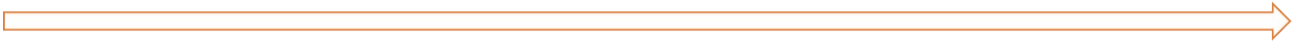

Elapsed time in thawing process

**Figure S3:** Thawing process of ice in the capillary observed by visible light. The figure is at a different timing from the measurement by the CCD camera. The change in each hue is owing to the automatic adjustment function of the WEB camera.
